# Supplementary material
Source: bioRxiv or medRxiv preprint supplement (https://medrxiv.org/highwire/filestream/76887/field_highwire_adjunct_files/0/2020.04.01.20050443-1.pdf)
Supplement: Supplementary file [file 2020.04.01.20050443-1.pdf]

Supplementary Material for:

**Can N95 respirators be reused after disinfection? And for how many times?**

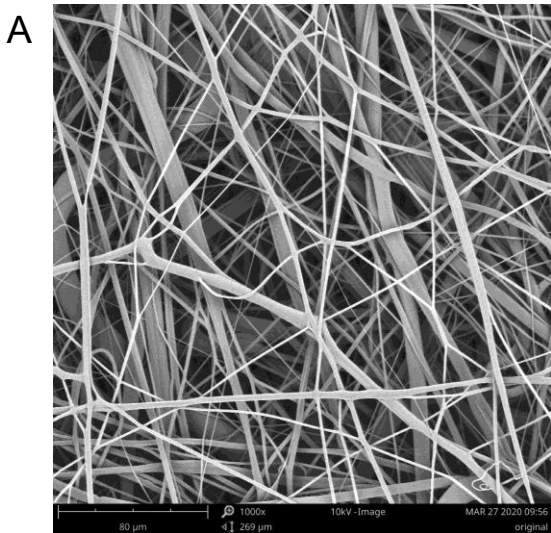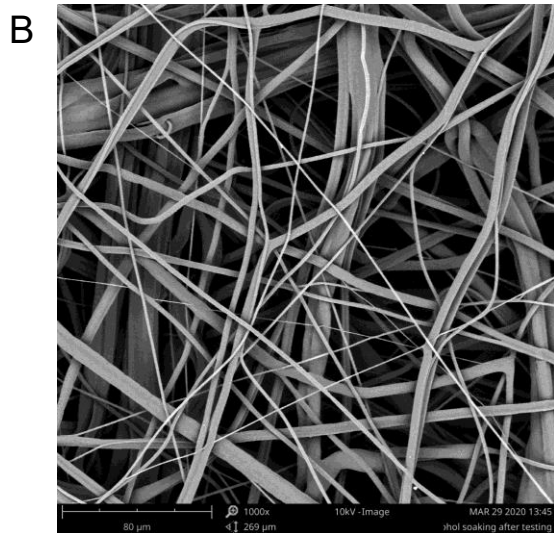

**Figure S1. Comparison of fibers before and after alcohol treatment.** A. Before treatment, B. after treatment. No differences in morphology, or damages were observed.

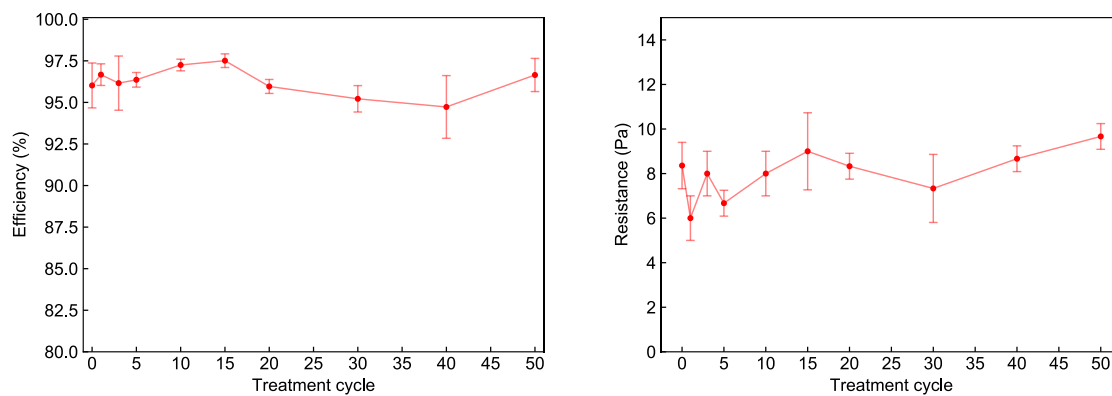

**Figure S2. Dry heat of 75 °C effect on meltblown fabrics.** A. Efficiency, B. Pressure drop. No major changes were observed in the filtration properties of the meltblown fabric after fifty cycles of 75 °C dry heat (30 minutes per cycle).

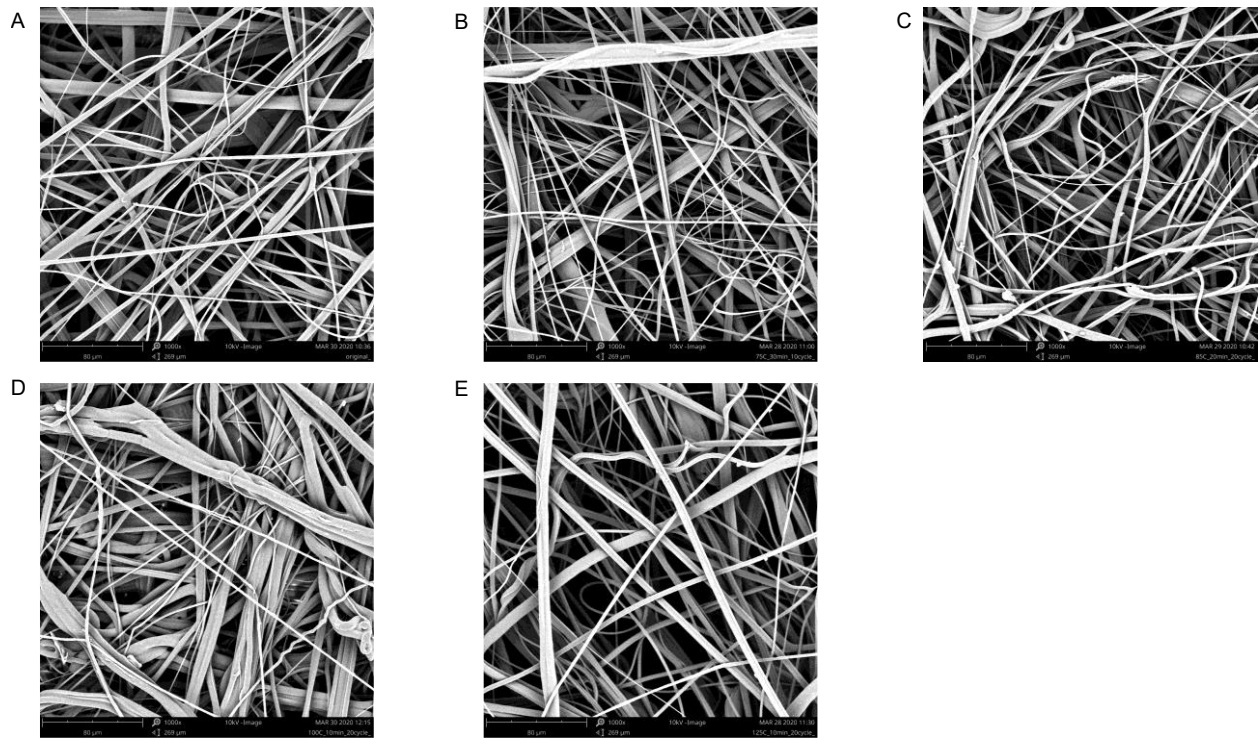

**Figure S3. SEM images of the meltblown fabric after different temperature treatments.** A. Original conditions. B. 75 °C (30 minutes). C. 85 °C (20 minutes). D. 100 °C (10 minutes). E. 125 °C (10 minutes). No significant changes were found in any of the heated samples compared with the original sample.

**Table S1. Filtration efficiency and pressure drop after ten-cycles of treatment.** We note that steam clearly had degradation in the filtration efficiency.

| Treatment          | Mode of application     | Treatment time (min/cycle) | Filtration efficiency (%) | Pressure drop (Pa) |
|--------------------|-------------------------|----------------------------|---------------------------|--------------------|
| Initial samples    |                         |                            | 96.52 ± 1.37              | 8.7 ± 1.0          |
| Dry heat (75 °C)   | Static-air oven         | 30                         | 97.25 ± 0.34              | 8.0 ± 1.0          |
| Steam              | Beaker of boiling water | 10                         | 80.65 ± 2.97              | 8.3 ± 1.2          |
| UVGI (254 nm, 8 W) | Sterilization cabinet   | 30                         | 96.78 ± 0.80              | 9.0 ± 1.7          |

**Table S2. Evolution of filtration efficiency based on steam treatment in a meltblown.** We see that after cycle 5 the efficiency has a significant drop.

| Cycle                | Efficiency (%)   | Pressure drop (Pa) |
|----------------------|------------------|--------------------|
| Initial              | $96.52 \pm 1.37$ | $8.7 \pm 1.0$      |
| Steam (10 min/cycle) |                  |                    |
| 1                    | $97.97 \pm 0.41$ | $10.0 \pm 0.0$     |
| 3                    | $96.41 \pm 1.07$ | $9.0 \pm 1.0$      |
| 5                    | $85.04 \pm 1.05$ | $7.3 \pm 1.2$      |
| 10                   | $80.65 \pm 2.97$ | $8.3 \pm 1.2$      |

**Table S3. Evolution of filtration efficiency with various temperatures in environmental chamber SH-642.** The humidity was set to the minimum set point, 30% RH at 85 °C. Above 85 °C the humidity cannot be well-controlled and will be <30% RH.

| Cycle                     | Efficiency (%) | Pressure Drop (Pa) |
|---------------------------|----------------|--------------------|
| Initial                   | 96.02 ± 1.35   | 8.3 ± 1.0          |
| 75 °C (30 minutes/cycle)  |                |                    |
| 1                         | 95.35 ± 0.96   | 8.0 ± 1.0          |
| 3                         | 94.99 ± 0.79   | 7.6 ± 0.5          |
| 5                         | 95.25 ± 0.77   | 7.3 ± 1.1          |
| 10                        | 95.94 ± 1.84   | 8.6 ± 0.5          |
| 15                        | 94.44 ± 0.37   | 7.0 ± 1.0          |
| 20                        | 96.49 ± 0.59   | 6.6 ± 0.5          |
| 85 °C (20 minutes/cycle)  |                |                    |
| 1                         | 95.96 ± 0.36   | 7.6 ± 0.5          |
| 3                         | 96.81 ± 0.85   | 7.6 ± 1.5          |
| 5                         | 95.56 ± 1.16   | 8.0 ± 1.7          |
| 10                        | 95.40 ± 0.27   | 7.6 ± 0.5          |
| 15                        | 96.07 ± 0.21   | 8.0 ± 1.7          |
| 20                        | 96.79 ± 0.18   | 9.0 ± 0.0          |
| 100 °C (10 minutes/cycle) |                |                    |
| 1                         | 94.71 ± 0.72   | 7.3 ± 0.5          |
| 3                         | 94.79 ± 0.30   | 8.0 ± 0.0          |
| 5                         | 94.58 ± 0.78   | 9.0 ± 1.0          |
| 10                        | 94.11 ± 1.37   | 8.6 ± 1.1          |
| 15                        | 95.95 ± 0.91   | 10.0 ± 1.0         |
| 20                        | 95.03 ± 1.31   | 9.6 ± 0.5          |
| 125 °C (10 minutes/cycle) |                |                    |
| 1                         | 96.23 ± 0.65   | 9.6 ± 1.1          |
| 3                         | 93.98 ± 0.38   | 9.6 ± 1.5          |
| 5                         | 91.08 ± 1.64   | 7.6 ± 0.5          |
| 10                        | 90.68 ± 1.01   | 8.3 ± 1.1          |
| 15                        | 90.94 ± 1.04   | 8.0 ± 1.7          |
| 20                        | 91.27 ± 1.62   | 8.0 ± 1.7          |
